# Supplementary material
Source: publisher figshare collection journal article supplement (https://acs.figshare.com/ndownloader/files/11004278)
Supplement: Supplementary file 1 [file 11004278]

## **Supporting Information**

### **Oxygen Incorporated and Polyaniline Intercalated 1T/2H Hybrid MoS<sub>2</sub> Nanosheets Arrayed on Reduced Graphene Oxide for High Performance Supercapacitors**

Jie Chao<sup>a</sup>, Lichun Yang<sup>a</sup>, Jiangwen Liu<sup>a</sup>, Renzong Hu<sup>a</sup> and Min Zhu<sup>a,\*</sup>

<sup>a</sup> SUNWODA-SCUT Joint Laboratory for Advanced Energy Storage Technology,  
South China University of Technology, Guangzhou, China, 510640

**\*Corresponding Author**

Email: [memzhu@scut.edu.cn](mailto:memzhu@scut.edu.cn)

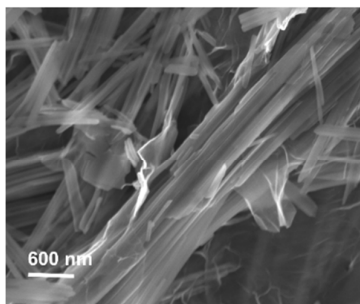

Figure S1. The SEM image of  $\text{Mo}_3\text{O}_{10}(\text{C}_6\text{H}_5\text{NH}_3)_2 \cdot 4\text{H}_2\text{O}/\text{GO}$  precursor.

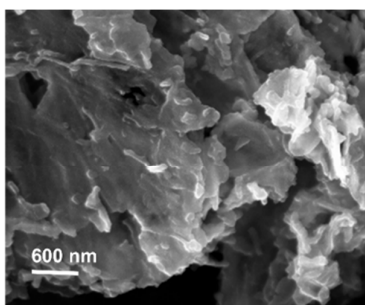

Figure S2. The SEM image of  $\text{MoO}_x/\text{PANI}/\text{GO}$ .

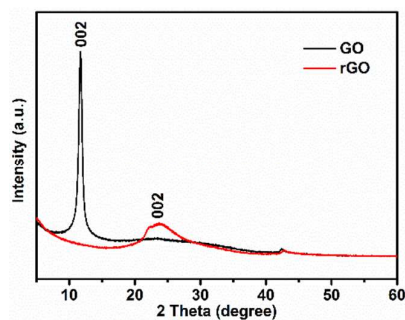

Figure S3 XRD patterns of GO and rGO which reduced in the hydrothermal reaction at 160 °C.

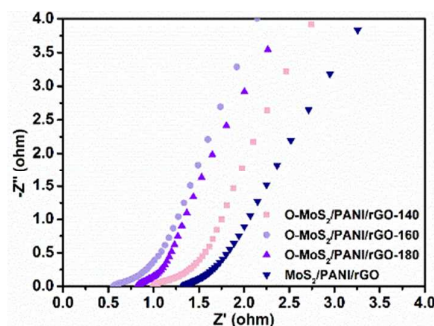

Figure S4. Nyquist plots of the O-MoS<sub>2</sub>/PANI/rGO-140 HNSs, O-MoS<sub>2</sub>/PANI/rGO-160 HNSs, O-MoS<sub>2</sub>/PANI/rGO-180 HNSs and MoS<sub>2</sub>/PANI/rGO HNSs tested in three-electrode configuration.

The Nyquist plot consists of a semicircle in the high frequency and an inclined line in the low frequency. The intercept at real part of the axis represent the equivalent series resistance (ESR) which is contributed by discontinuity of charge transfer at the solid/liquid interface, the intrinsic resistance of the electrode, contact resistance between the current collector and active materials and resistance induced by the faradaic process. The semicircle represents the charge transfer resistance and the inclined line is related to the ion transfer in the solid electrode. The ESR value of O-MoS<sub>2</sub>/PANI/rGO-160 HNSs (0.55  $\Omega$ ) is lower than that of O-MoS<sub>2</sub>/PANI/rGO-140 HNSs (0.99  $\Omega$ ), O-MoS<sub>2</sub>/PANI/rGO-180 HNSs (0.81  $\Omega$ ) and MoS<sub>2</sub>/PANI/rGO HNSs (1.32  $\Omega$ ). No obvious semicircles can be observed in the Nyquist plots, which is due to the low internal resistance. The inclined lines in the low frequency for the O-MoS<sub>2</sub>/PANI/rGO-160 HNSs are more vertical than that for the O-MoS<sub>2</sub>/PANI/rGO-140 HNSs, O-MoS<sub>2</sub>/PANI/rGO-180 HNSs and MoS<sub>2</sub>/PANI/rGO

HNSs indicating faster diffusion of  $H^+$  in the electrode. Therefore, the comparisons of the Nyquist plots demonstrate the electron and ion transfer is enhanced in the O-MoS<sub>2</sub>/PANI/rGO-160 HNSs.

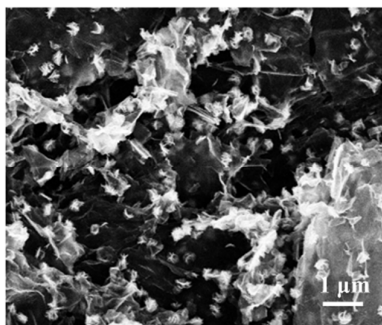

Figure S5 SEM image of O-MoS<sub>2</sub>/PANI/rGO-160 HNSs after 50000 cycles

Table S1. Comparison of supercapacitive performance of recently reported

MoS<sub>2</sub>-based materials.

| Electrode materials                    | Specific capacitance*                                                                 | Cycle performance                                 | Test system     | Ref.         |
|----------------------------------------|---------------------------------------------------------------------------------------|---------------------------------------------------|-----------------|--------------|
| MoS <sub>2-x</sub> O <sub>x</sub> -39h | 246 F g <sup>-1</sup> at 0.5 A g <sup>-1</sup> in 0.5M H <sub>2</sub> SO <sub>4</sub> | 60.1% after 20,000 cycles at 4 A g <sup>-1</sup>  | three-electrode | <sup>1</sup> |
| O-MoS <sub>2</sub> micropheres         | 744.2 F g <sup>-1</sup> at 1 A g <sup>-1</sup> in 1M KCl                              | 77.8% after 10,000 cycles at 5 A g <sup>-1</sup>  | three-electrode | <sup>2</sup> |
| 2D Tubular MoS <sub>2</sub> /Ppy       | 462 F g <sup>-1</sup> at 1 A g <sup>-1</sup> in 0.5M Na <sub>2</sub> SO <sub>4</sub>  | 82% after 2,000 cycles at 3 A g <sup>-1</sup>     | three-electrode | <sup>3</sup> |
| 1T/2H MoS <sub>2</sub>                 | 346F g <sup>-1</sup> at 1 A g <sup>-1</sup> in 2M KOH                                 | 95.4% after 2,000 cycles                          | three-electrode | <sup>4</sup> |
| MoS <sub>2</sub> /C aerogels           | 712.6 F g <sup>-1</sup> at 1 A g <sup>-1</sup> in 6M KOH                              | 97.3% after 13,000 cycles                         | three-electrode | <sup>5</sup> |
| This work                              | 752.0 F g <sup>-1</sup> at 1 A g <sup>-1</sup> in 1M H <sub>2</sub> SO <sub>4</sub>   | 80.4% after 50,000 cycles at 50 A g <sup>-1</sup> | Three-electrode |              |

## References

- (1) Zhou, J.; Fang, G.; Pan, A.; Liang, S. Oxygen-Incorporated MoS<sub>2</sub> Nanosheets with Expanded Interlayers for Hydrogen Evolution Reaction and Pseudocapacitor Applications. *ACS Appl. Mater. Interfaces* **2016**, *8*, 33681-33689.
- (2) Sun, T.; Li, Z.; Liu, X.; Ma, L.; Wang J.; Yang, S. Oxygen-incorporated MoS<sub>2</sub> microspheres with tunable interiors as novel electrode materials for supercapacitors. *J. Power Sources* **2017**, *352*, 135-142.
- (3) Chen, Y.; Ma, W., Cai, K.; Yang, X.; Huang, C. In Situ Growth of Polypyrrole onto Three-Dimensional Tubular MoS<sub>2</sub> as an Advanced Negative Electrode Material for Supercapacitor. *Electrochi. Acta* **2017**, *246*, 615-624.
- (4) Wang, D.; Xiao, Y.; Luo, X.; Wu, Z.; Wang, Y. J.; Fang, B. Swollen Ammoniated MoS<sub>2</sub> with 1T/2H Hybrid Phases for High-Rate Electrochemical Energy Storage. *ACS Sustainable Chem. Eng.* **2017**, *5*, 2509-2515.
- (5) Zhang, Y.; He, T.; Liu, G.; Zu, L.; Yang J. One-pot mass preparation of MoS<sub>2</sub>/C aerogels for high-performance supercapacitors and lithium-ion batteries. *Nanoscale* **2017**, *9*, 10059-10066.
